# Supplementary material for: Efficacy and Safety of Bone Marrow-Derived Mesenchymal Stem Cells for Chronic Antibody-Mediated Rejection After Kidney Transplantation- A Single-Arm, Two-Dosing-Regimen, Phase I/II Study
Source: PubMed Central journal article supplement (PMC8267917; doi:10.3389/fimmu.2021.662441), 2021-06-25
Supplement: DataSheet_2.pdf [file DataSheet_2.pdf]

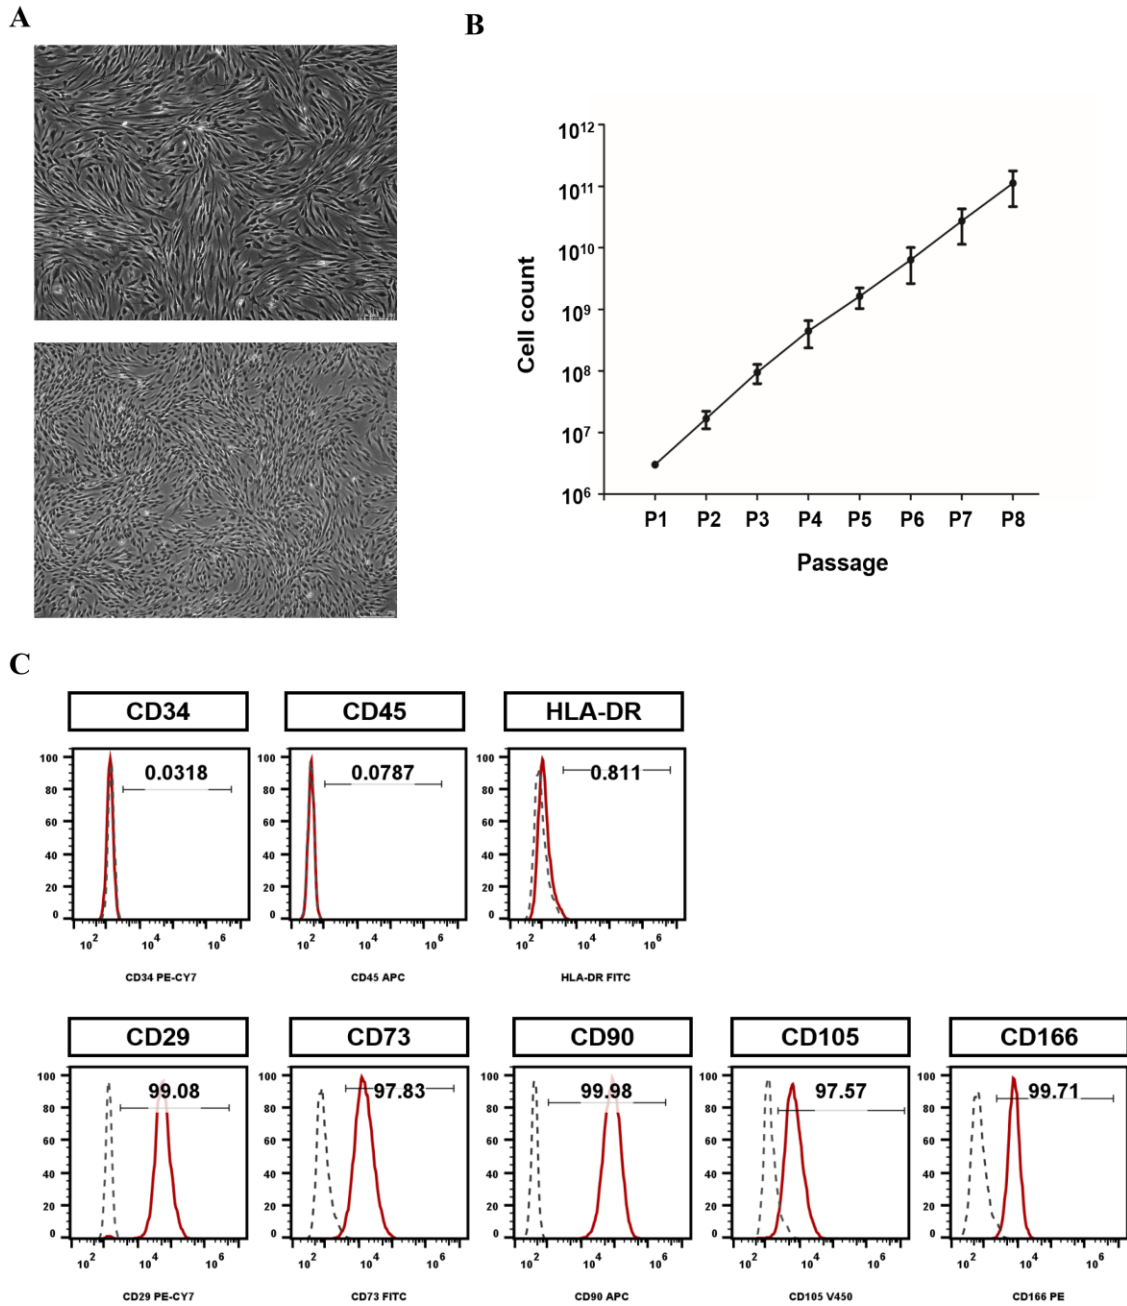

Supplemental Figure 1



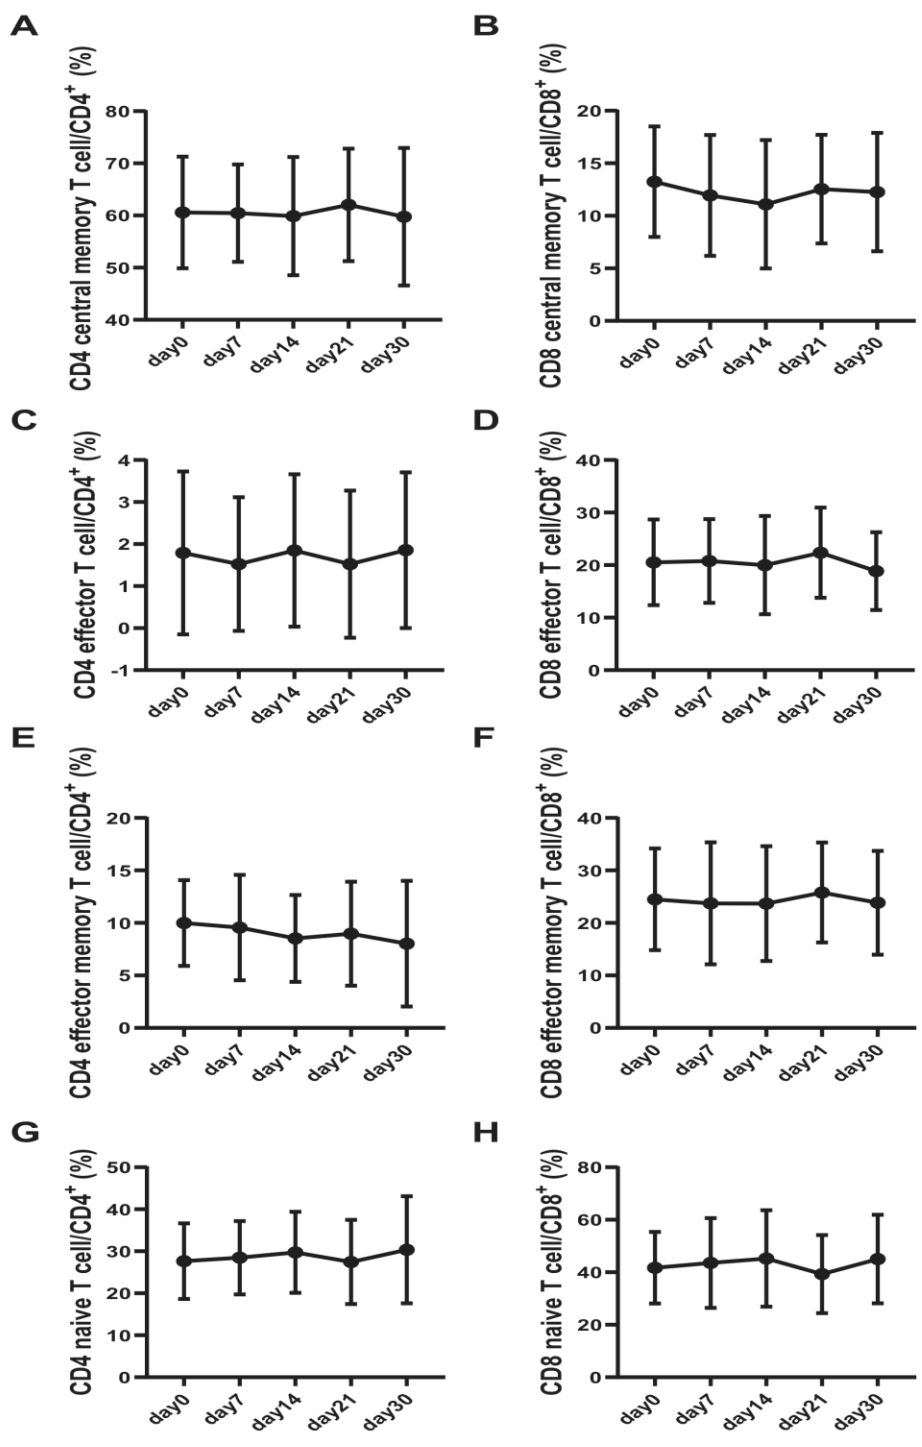

Supplemental Figure 3-1

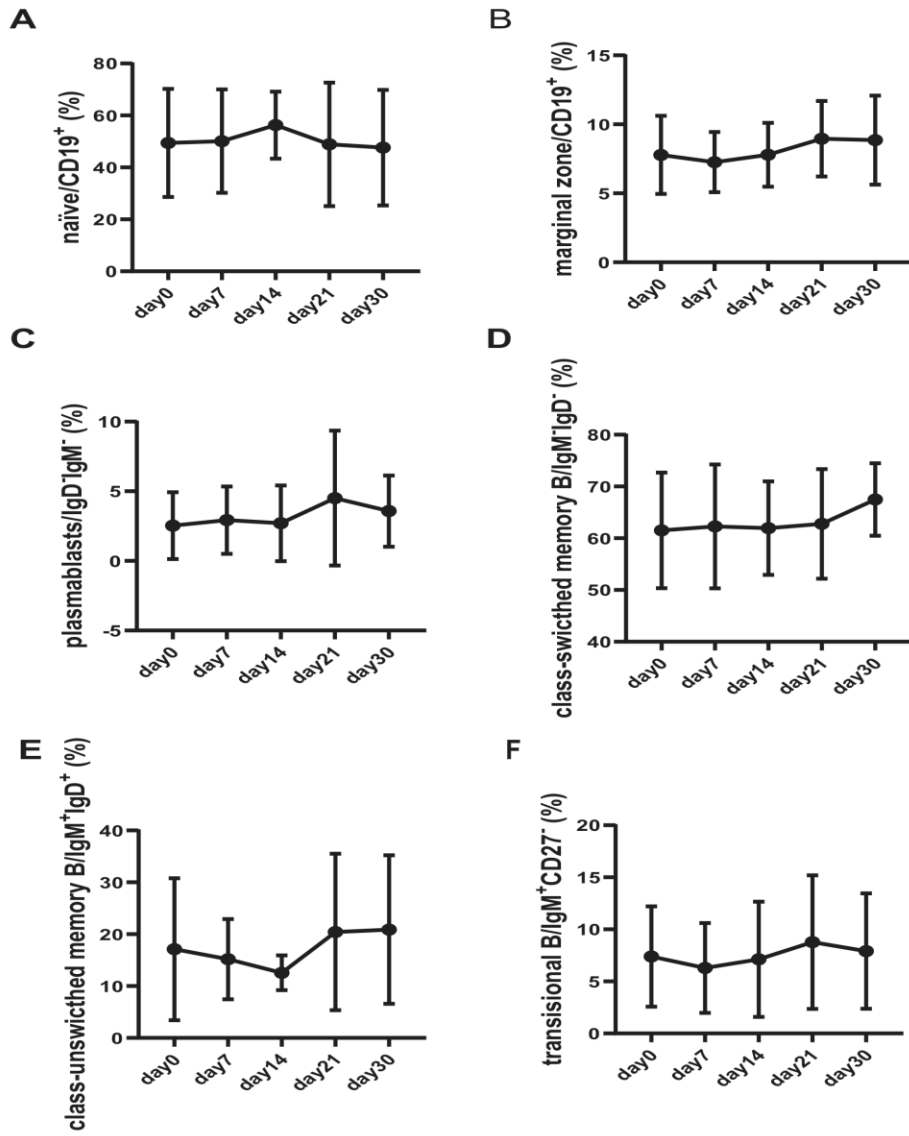

Supplemental Figure 3-2

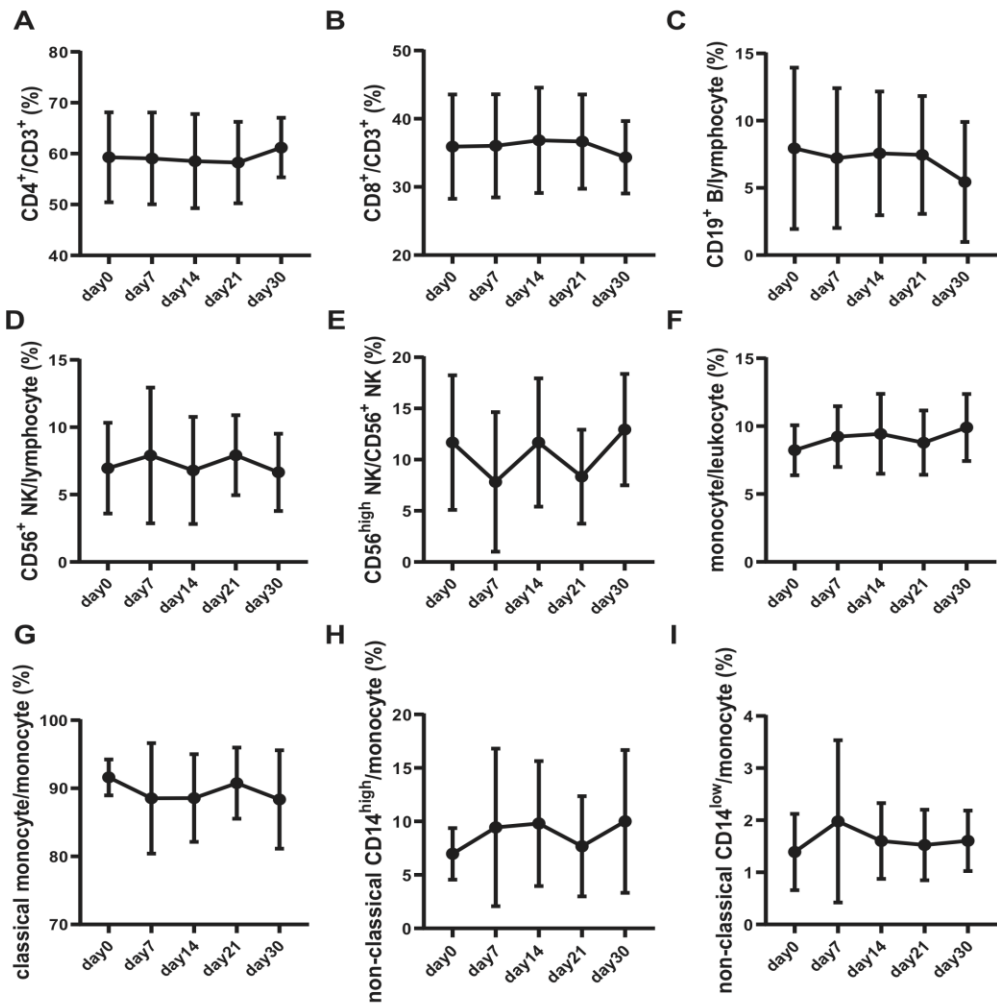

Supplemental Figure 3-3

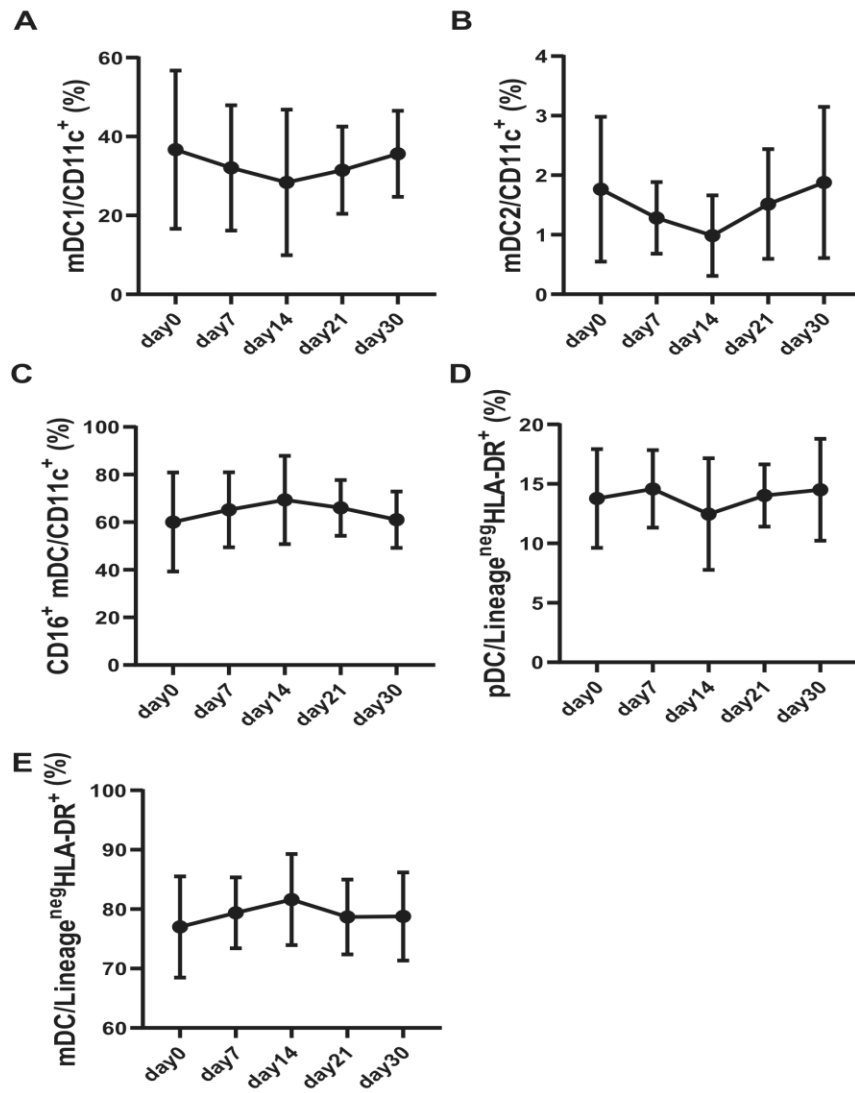

Supplemental Figure 3-4

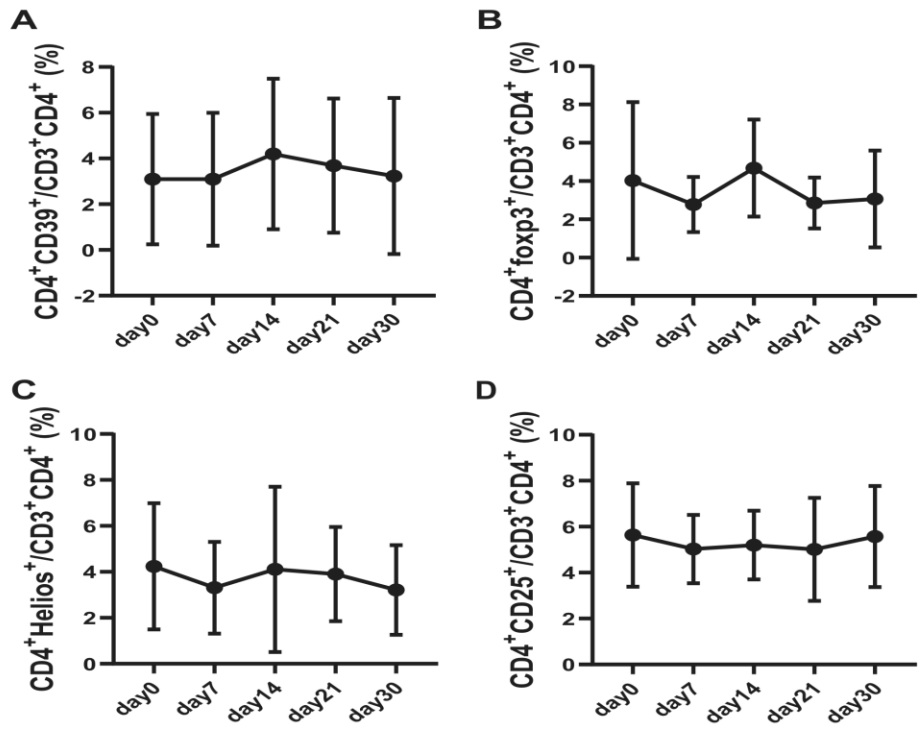

Supplemental Figure 3-5

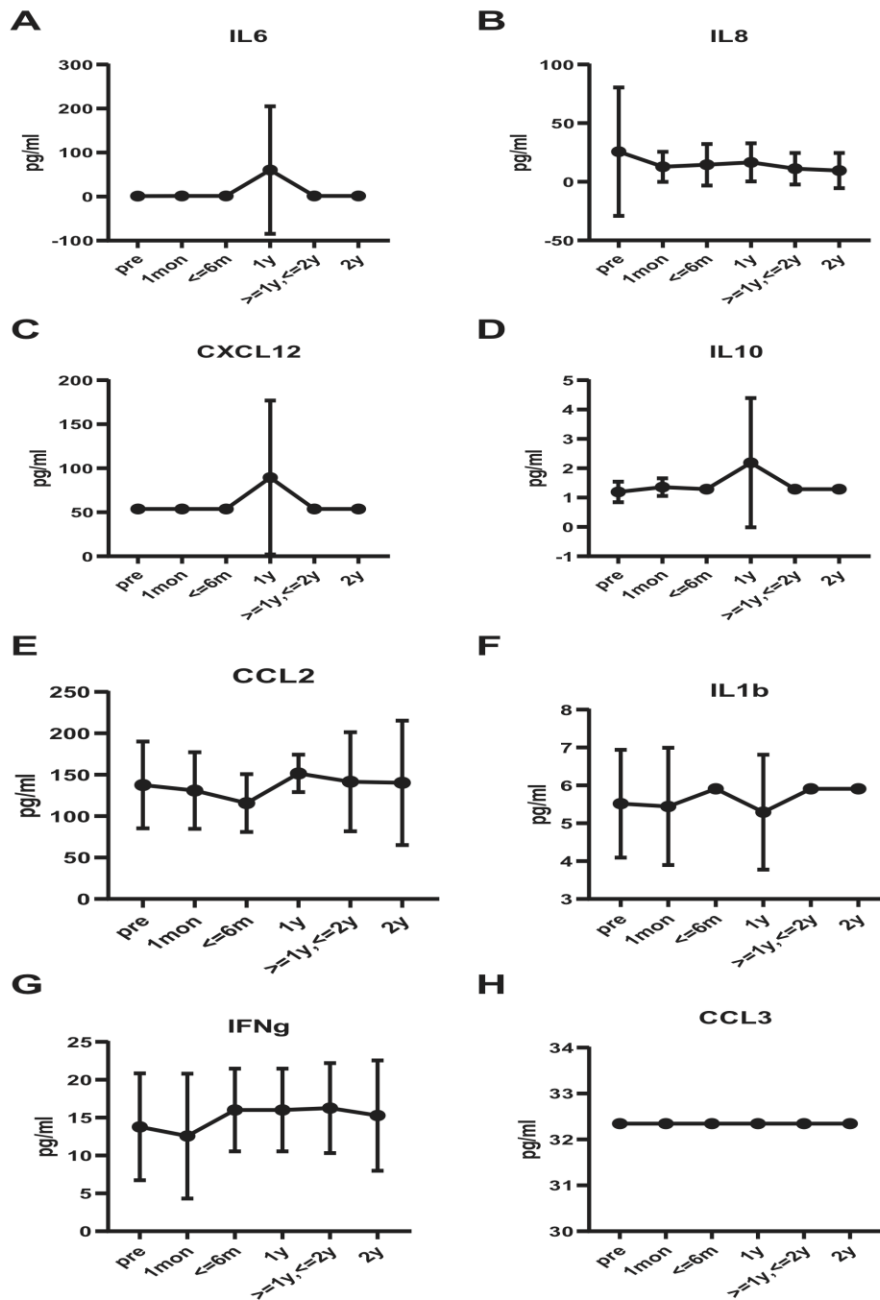

Supplemental Figure 4-1



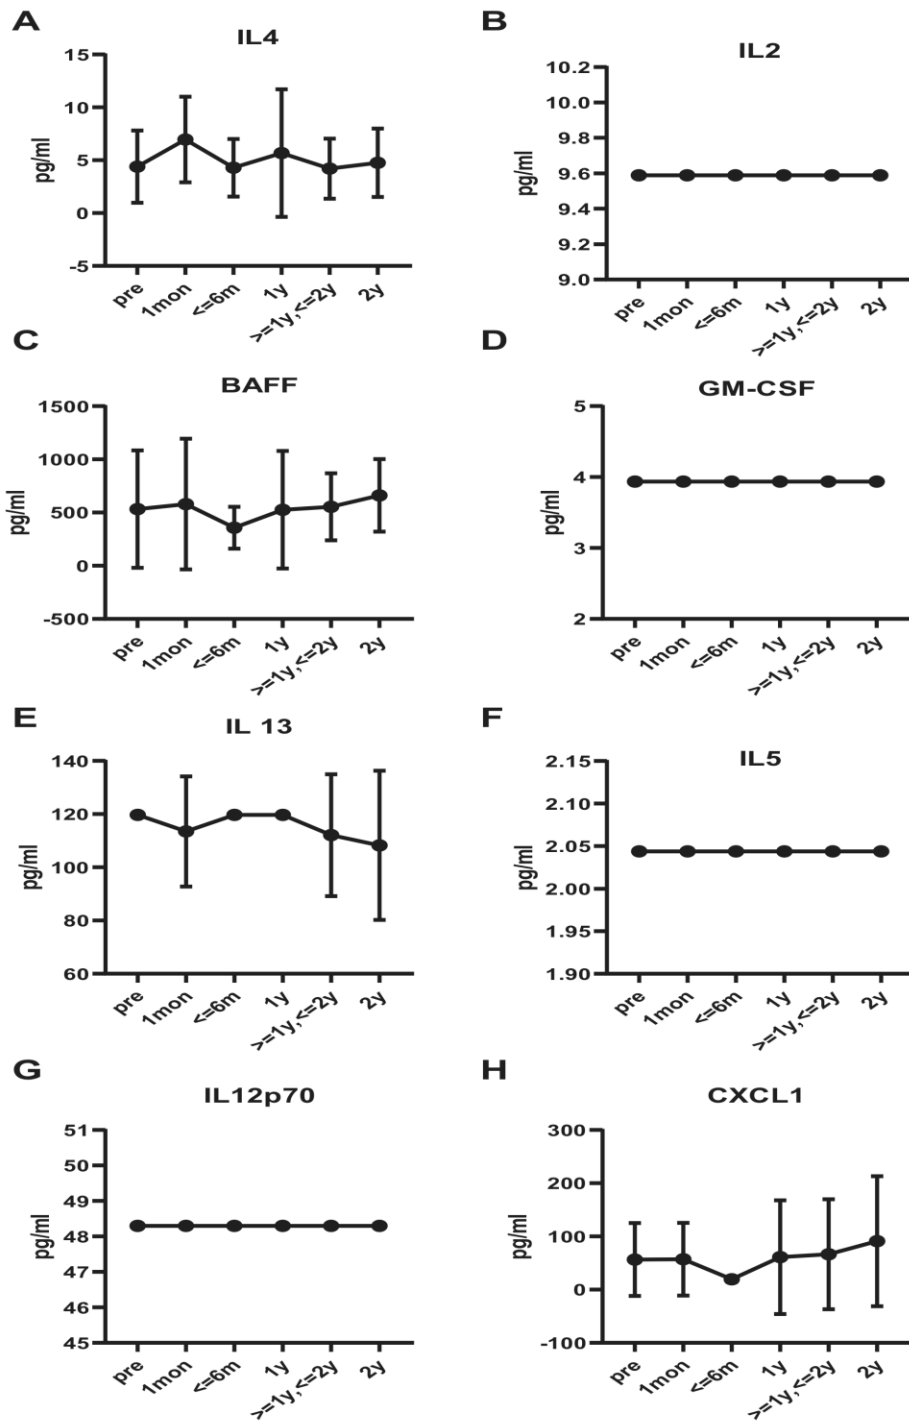

Supplemental Figure 4-2
